# Supplementary material for: HIMMELI v1.0: HelsinkI Model of MEthane buiLd-up and emIssionfor peatlands
Source: Copernicus journal article supplement (doi:10.5194/gmd-2017-52), 2017-03-27
Supplement: Supplementary file 1 [file gmd-2017-52-supplement.zip]

# HIMMELI 1.0 – Helsinki Model of MEthane buiLd-up and emIssion for peatlands

## User manual

-----  
This software is provided as supplementary material with:

Raivonen, M., Smolander, S., Backman, L., Susiluoto, J., Aalto, T., Markkanen, T., Mäkelä, J., Rinne, J., Peltola, O., Aurela, M., Tomasic, M., Li, X., Larmola, T., Juutinen, S., Tuittila, E.-S., Heimann, M., Sevanto, S., Kleinen, T., Brovkin, V., and Vesala, T.: HIMMELI – Helsinki Model of MEthane buiLd-up and emIssion for peatlands, *Geosci. Model Dev. Discuss.*, XXX, 2017.

The software can freely be used, on condition that this article is cited in publications. Please see the license.

-----

### 1. COMPILING

The software is coded in FORTRAN 90 and consists of the following files:

Makefile

|                        |                                                                           |
|------------------------|---------------------------------------------------------------------------|
| methane_main.f90       | - Main program                                                            |
| methane_parameters.f90 | - Contains model parameters and other control of the model run            |
| methane_geometry.f90   | - Controls the geometry of the grid, e.g. the movement of the water table |
| methane_output.f90     | - Controls the output of the model                                        |

The makefile is for compiling with gfortran. It is run with command **make**. This produces the executable file *model.exe*.

### 2. PARAMETERS

The set-up of the model runs is controlled via methane\_parameters.f90. It contains definitions of:

- constants (such as the gas constant)
- model parameter values
- the set-up of the run. Specifically, you can define:
  - peat depth
  - layer thickness
  - length of the model run, maximum is the length of the input data

### 3. INPUT FILES

The model requires as input two text files, named in the code *input\_data.txt* and *ztemp\_data.txt*.

- input\_data.txt* needs 5 columns:

| Column #       | 1     | 2                            | 3                                                                                  | 4                                            | 5                                                                           |
|----------------|-------|------------------------------|------------------------------------------------------------------------------------|----------------------------------------------|-----------------------------------------------------------------------------|
| Input variable | Day # | Air temperature<br>*unit: °C | Water table depth<br>*positive values <u>below</u><br>the peat surface<br>*unit: m | LAI<br>*unit: m <sup>2</sup> m <sup>-2</sup> | Rate of anoxic<br>respiration<br>*unit: mol m <sup>-2</sup> s <sup>-1</sup> |

- b) *ztemp\_data.txt* is the soil temperature profile. Its column number depends on the peat layer structure: there should be daily temperature values for each peat layer, starting from the bottom layer in column 1. No column for time is used.

#### 4. OUTPUT

The model outputs the following text files:

- a) *output\_methane\_water.txt* – time series of methane concentrations in water-filled peat layers  
*output\_co2\_water.txt* – time series of carbon dioxide concentrations in water-filled peat layers  
*output\_oxygen\_water.txt* – time series of oxygen concentrations in water-filled peat layers  
*output\_methane\_air.txt* – time series of methane concentrations in air-filled peat layers  
*output\_co2\_air.txt* – time series of carbon dioxide concentrations in air-filled peat layers  
*output\_oxygen\_air.txt* – time series of oxygen concentrations in air-filled peat layers

In these concentration files, there are 4 columns, titled *t*, *y*, *w* and *conc*. Column 1 (*t*) is the day number, column 2 (*y*) is the thickness of the layer [m], column 3 (*w*) is the time step [d], and column 4 (*conc*) is the concentration of the compound [ $\text{mol m}^{-3}$ ]. The daily set of concentrations always starts from the bottom layer.

- b) *output\_fluxes.txt* – time series of fluxes of methane, CO<sub>2</sub> and oxygen between the soil and the atmosphere, separated to the different transport routes  
*output\_processes.txt* – time series of removal and production rates of methane, CO<sub>2</sub> and oxygen in the total peat column, separated to the different microbial or transport processes

The columns in *output\_fluxes.txt* are:

- |    |                                                                                                                                                           |
|----|-----------------------------------------------------------------------------------------------------------------------------------------------------------|
| 1  | <i>t</i>                                                                                                                                                  |
| 2  | diffusion of methane [ $\text{mol s}^{-1} \text{m}^{-2}$ ]                                                                                                |
| 3  | plant transport of methane [ $\text{mol s}^{-1} \text{m}^{-2}$ ]                                                                                          |
| 4  | ebullition of methane directly to atmosphere [ $\text{mol s}^{-1} \text{m}^{-2}$ ]                                                                        |
| 5  | total ebullition of methane (including ebullition that is retained in air-filled peat layers above the water table) [ $\text{mol s}^{-1} \text{m}^{-2}$ ] |
| 6  | diffusion of CO <sub>2</sub> [ $\text{mol s}^{-1} \text{m}^{-2}$ ]                                                                                        |
| 7  | plant transport of CO <sub>2</sub> [ $\text{mol s}^{-1} \text{m}^{-2}$ ]                                                                                  |
| 8  | ebullition of CO <sub>2</sub> directly to atmosphere [ $\text{mol s}^{-1} \text{m}^{-2}$ ]                                                                |
| 9  | total ebullition of CO <sub>2</sub> [ $\text{mol s}^{-1} \text{m}^{-2}$ ]                                                                                 |
| 10 | diffusion of O <sub>2</sub> [ $\text{mol s}^{-1} \text{m}^{-2}$ ]                                                                                         |
| 11 | plant transport of O <sub>2</sub> [ $\text{mol s}^{-1} \text{m}^{-2}$ ]                                                                                   |
| 12 | ebullition of O <sub>2</sub> directly to atmosphere [ $\text{mol s}^{-1} \text{m}^{-2}$ ]                                                                 |
| 13 | total ebullition of O <sub>2</sub> [ $\text{mol s}^{-1} \text{m}^{-2}$ ]                                                                                  |
| 14 | methane flux caused by changing water table depth [ $\text{mol s}^{-1} \text{m}^{-2}$ ]                                                                   |
| 15 | O <sub>2</sub> flux caused by changing water table depth [ $\text{mol s}^{-1} \text{m}^{-2}$ ]                                                            |
| 16 | CO <sub>2</sub> flux caused by changing water table depth [ $\text{mol s}^{-1} \text{m}^{-2}$ ]                                                           |

The columns in *output\_processes.txt* are:

|    |                                                                                                                                                           |
|----|-----------------------------------------------------------------------------------------------------------------------------------------------------------|
| 1  | t                                                                                                                                                         |
| 2  | diffusion of methane [ $\text{mol s}^{-1} \text{m}^{-2}$ ]                                                                                                |
| 3  | plant transport of methane [ $\text{mol s}^{-1} \text{m}^{-2}$ ]                                                                                          |
| 4  | ebullition of methane directly to atmosphere [ $\text{mol s}^{-1} \text{m}^{-2}$ ]                                                                        |
| 5  | total ebullition of methane (including ebullition that is retained in air-filled peat layers above the water table) [ $\text{mol s}^{-1} \text{m}^{-2}$ ] |
| 6  | methane production in anoxic respiration [ $\text{mol s}^{-1} \text{m}^{-2}$ ]                                                                            |
| 7  | methane consumption in oxidation [ $\text{mol s}^{-1} \text{m}^{-2}$ ]                                                                                    |
| 8  | diffusion of $\text{CO}_2$ [ $\text{mol s}^{-1} \text{m}^{-2}$ ]                                                                                          |
| 9  | plant transport of $\text{CO}_2$ [ $\text{mol s}^{-1} \text{m}^{-2}$ ]                                                                                    |
| 10 | ebullition of $\text{CO}_2$ directly to atmosphere [ $\text{mol s}^{-1} \text{m}^{-2}$ ]                                                                  |
| 11 | total ebullition of $\text{CO}_2$ [ $\text{mol s}^{-1} \text{m}^{-2}$ ]                                                                                   |
| 12 | $\text{CO}_2$ production in anoxic respiration [ $\text{mol s}^{-1} \text{m}^{-2}$ ]                                                                      |
| 13 | $\text{CO}_2$ production in oxic respiration [ $\text{mol s}^{-1} \text{m}^{-2}$ ]                                                                        |
| 14 | $\text{CO}_2$ production in methane oxidation [ $\text{mol s}^{-1} \text{m}^{-2}$ ]                                                                       |
| 15 | diffusion of $\text{O}_2$ [ $\text{mol s}^{-1} \text{m}^{-2}$ ]                                                                                           |
| 16 | plant transport of $\text{O}_2$ [ $\text{mol s}^{-1} \text{m}^{-2}$ ]                                                                                     |
| 17 | ebullition of $\text{O}_2$ directly to atmosphere [ $\text{mol s}^{-1} \text{m}^{-2}$ ]                                                                   |
| 18 | total ebullition of $\text{O}_2$ [ $\text{mol s}^{-1} \text{m}^{-2}$ ]                                                                                    |
| 19 | $\text{O}_2$ consumption in inhibition of methane production [ $\text{mol s}^{-1} \text{m}^{-2}$ ]                                                        |
| 20 | $\text{O}_2$ consumption in oxic respiration [ $\text{mol s}^{-1} \text{m}^{-2}$ ]                                                                        |
| 21 | $\text{O}_2$ consumption in methane oxidation [ $\text{mol s}^{-1} \text{m}^{-2}$ ]                                                                       |

These files contain partly overlapping data since the transport fluxes are recorded both in *output\_fluxes* and *output\_processes* files. However, the signs are different: in *output\_fluxes* an emission flux of a compound into the atmosphere is a positive flux while in *output\_processes* it is negative, signifying removal of the compound from the peat.
