# Supplementary material for: HIMMELI v1.0: HelsinkI Model of MEthane buiLd-up and emIssionfor peatlands
Source: Copernicus journal article supplement (doi:10.5194/gmd-2017-52), 2017-03-27
Supplement: Supplementary file 2 [file gmd-2017-52-supplement.zip]

Archive with 8 entries (7 files):
- HIMMELI_v1.0/
- HIMMELI_v1.0/HIMMELI_user_manual_1.pdf
- HIMMELI_v1.0/License_BSD2.txt
- HIMMELI_v1.0/Makefile
- HIMMELI_v1.0/methane_geometry.f90
- HIMMELI_v1.0/methane_main.f90
- HIMMELI_v1.0/methane_output.f90
- HIMMELI_v1.0/methane_parameters.f90
